# Supplementary material
Source: MDPI journal article supplement (https://www.mdpi.com/2673-5261/5/1/5)
Supplement: s1 [file s1]

Archive with 3 entries (3 files):
- Supplementary Figure S1.pdf
- Supplementary Figure S2.pdf
- Supplementary Figure S3.pdf
