# Supplementary material
Source: MDPI journal article supplement (https://www.mdpi.com/2673-5261/5/1/5)
Supplement: s1 [file s1]

**A**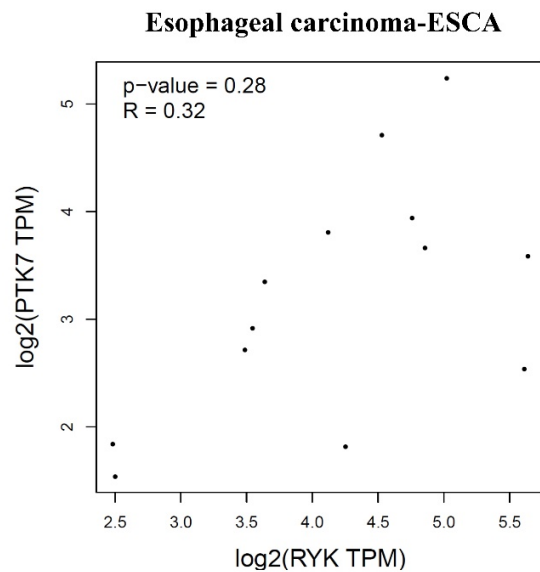**B**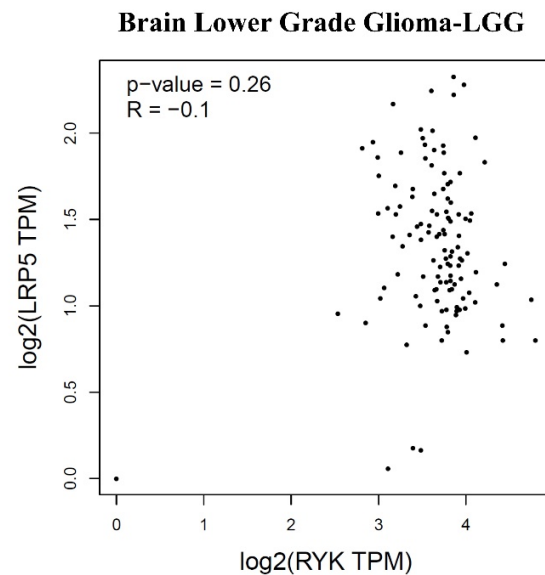**C**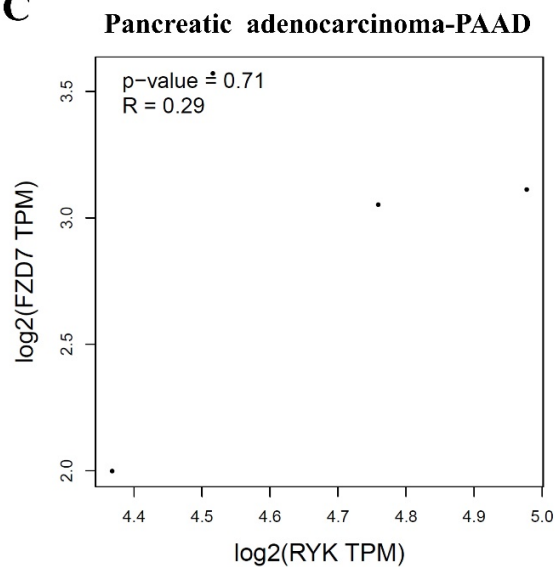

**Supplementary Figure S1. Correlation between RYK and WNT pathway receptors in cancer using TCGA data.** The correlation diagram illustrates the association between the expression of select WNT receptors and the RYK coreceptor. The data is presented as Transcripts Per Million normalized and log-transformed to base 2 (TPM Log2 Expression Spearman correlation coefficient (R) indicating the strength of the correlation. Panels include (A) Protein tyrosine kinase 7 (PTK7), (B) LDL receptor-related protein 5 (LRP5), and (C) Frizzled class receptor 7 (FZD7).
