# Supplementary material
Source: MDPI journal article supplement (https://www.mdpi.com/2673-5261/5/1/5)
Supplement: s1 [file s1]

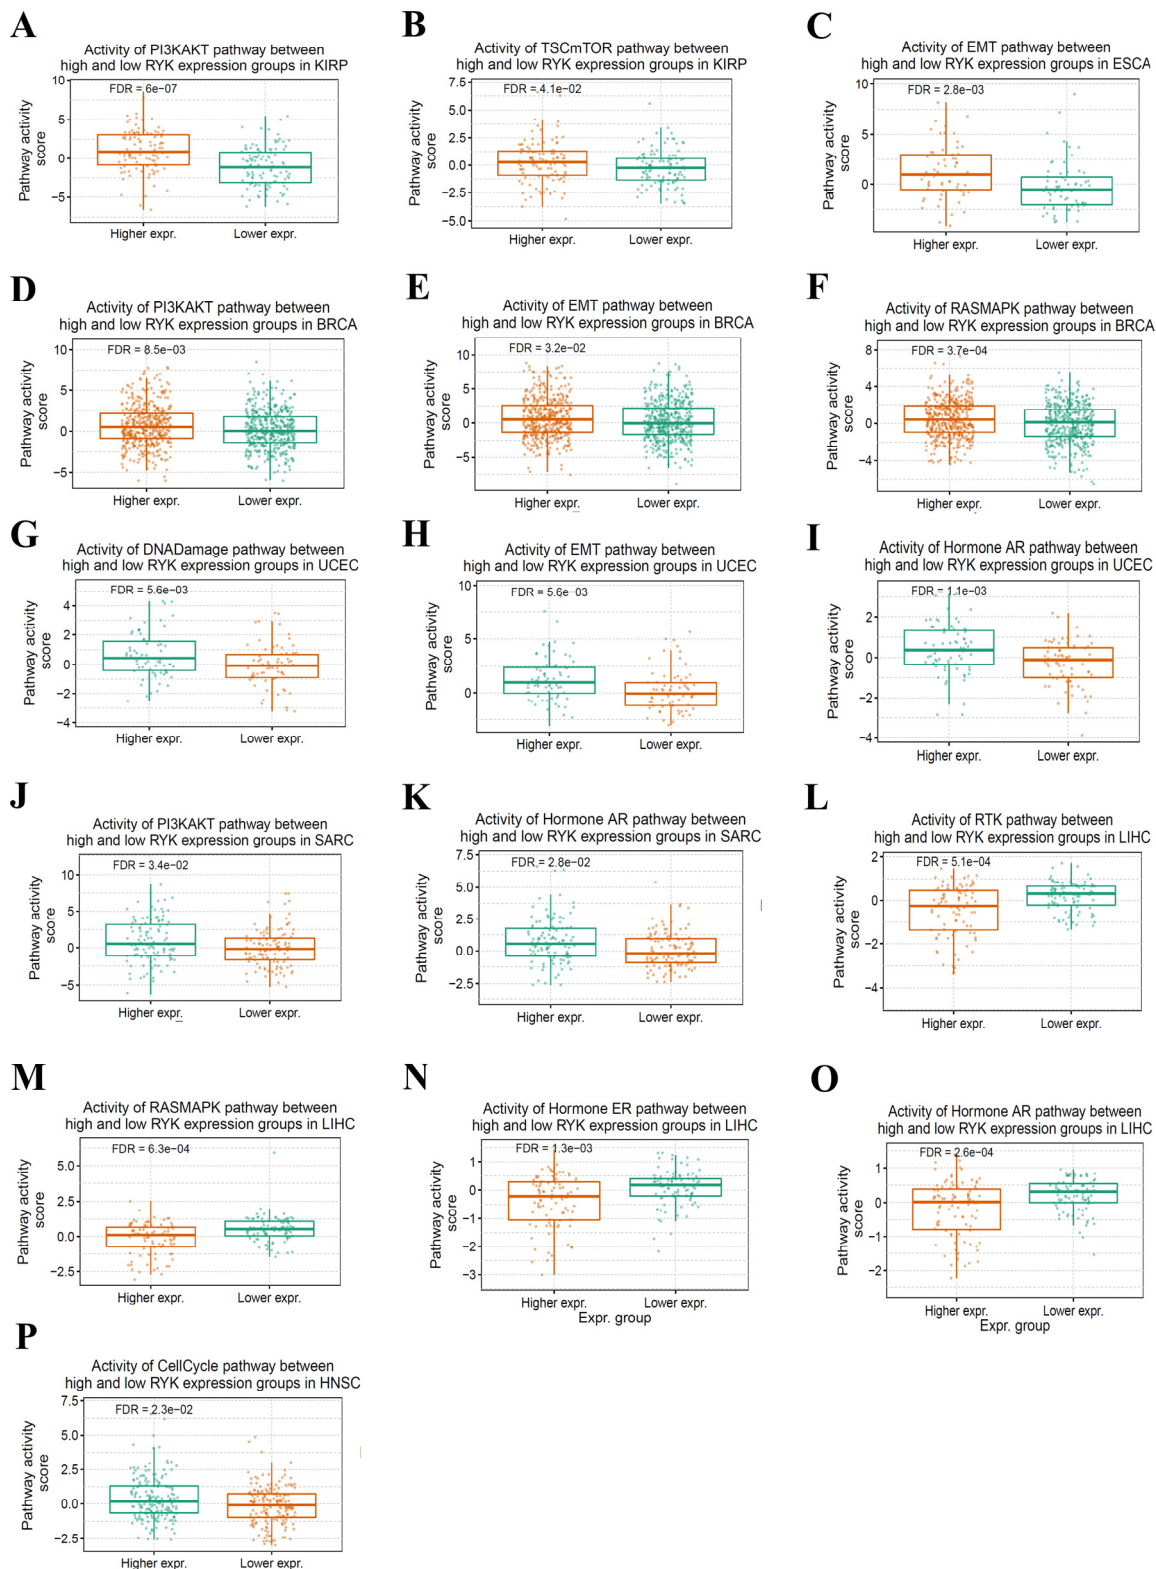

**Supplementary Figure S2. Activity Score of Cancer-Related Signaling Pathways where *RYK* is Upregulated.** Figure S2 (A) to (P) present boxplots illustrating the expression of *RYK* in high and low expression groups, using data obtained from the TCGA project. Specifically, (A), (B), and (E) represent Kidney renal papillary cell carcinoma (KIRP), (C) represents Uterine Corpus Endometrial Carcinoma (UCEC), (D) represents Esophageal carcinoma (ESCA), and (G), (H), and (I) represent Sarcoma (SARC), as well as (J) and (K) representing Breast invasive carcinoma (BRCA). High expression (High expr), low expression (Lower expr), false discovery rates (FDR). All relationships depicted have a significance level of less than 0.05.
